# Supplementary material
Source: publisher figshare collection journal article supplement (https://acs.figshare.com/ndownloader/files/25870887)
Supplement: Supplementary file 1 [file 25870887]

# Supporting Information

## **Green-Solvent-Processed Fibrous Membranes with Water/Oil/Dust Resistant and Breathable Performances for Protective Textiles**

*Wen Zhou,<sup>†</sup> Xi Yu,<sup>†</sup> Yang Li,<sup>‡</sup> Wenling Jiao,<sup>†</sup> Yang Si,<sup>\*,†,‡</sup> Jianyong Yu,<sup>†,‡</sup> Bin Ding<sup>\*,†,‡</sup>*

<sup>†</sup>State Key Laboratory for Modification of Chemical Fibers and Polymer Materials, College of Textiles, Donghua University, Shanghai 201620, China

<sup>‡</sup>Innovation Center for Textile Science and Technology, Donghua University, Shanghai 200051, China

\*Corresponding author:

binding@dhu.edu.cn, orcid.org/0000-0003-1499-2154.

yangsi@dhu.edu.cn, orcid.org/0000-0001-8716-0549.

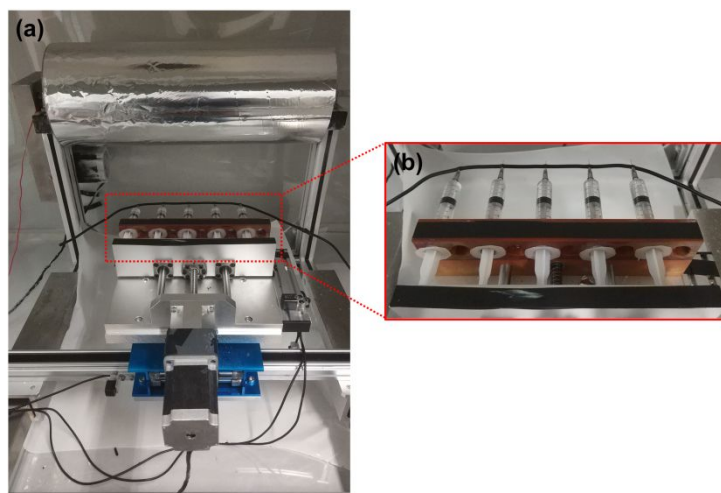

**Figure S1.** Photographs showing (a) the DXES-8 electrospinning machine and (b) five plastic syringes loaded on the filling pump.

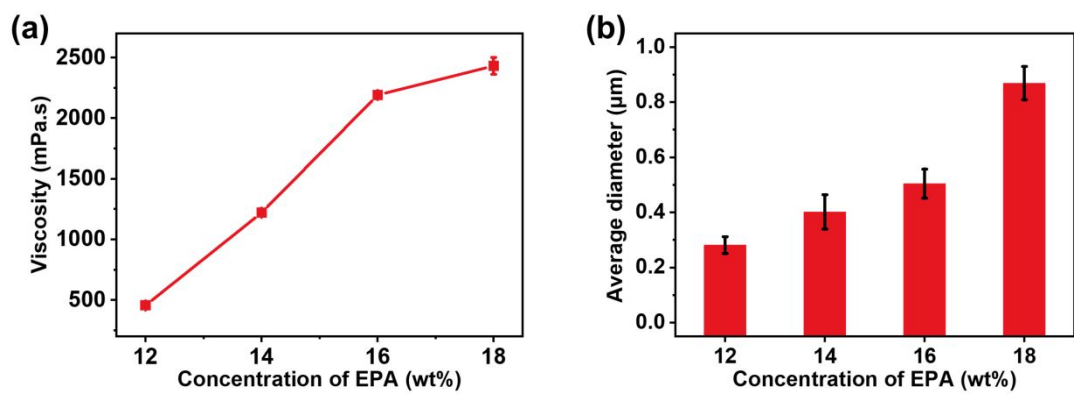

**Figure S2.** (a) The viscosity of spinning solutions and (b) average diameter of the obtained fibers with various EPA concentrations.

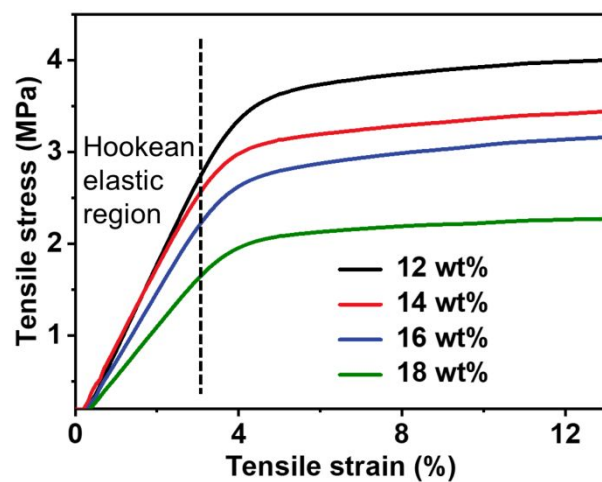

**Figure S3.** The start region of tensile stress-strain curves of the fibrous membranes with various EPA concentrations.

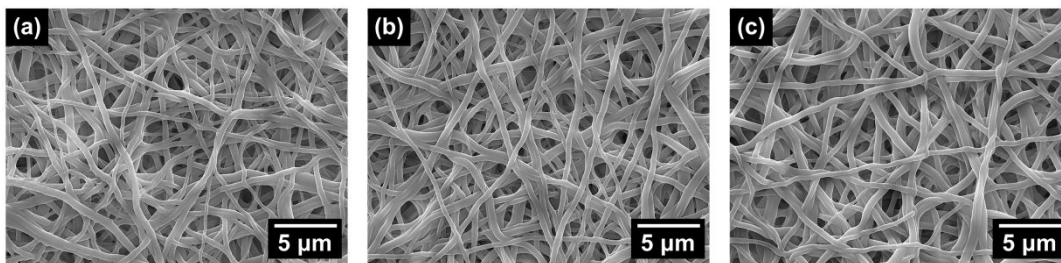

**Figure S4.** SEM images of the TEPA fibrous membranes fabricated from various WFP concentrations of (a) 2, (b) 4, and (c) 8 wt%.

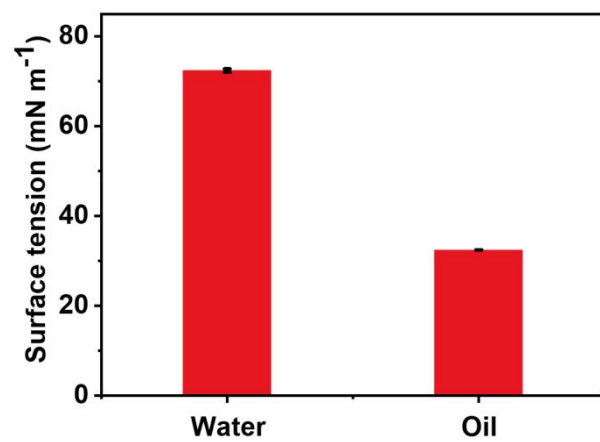

**Figure S5.** The surface tension of water and oil.

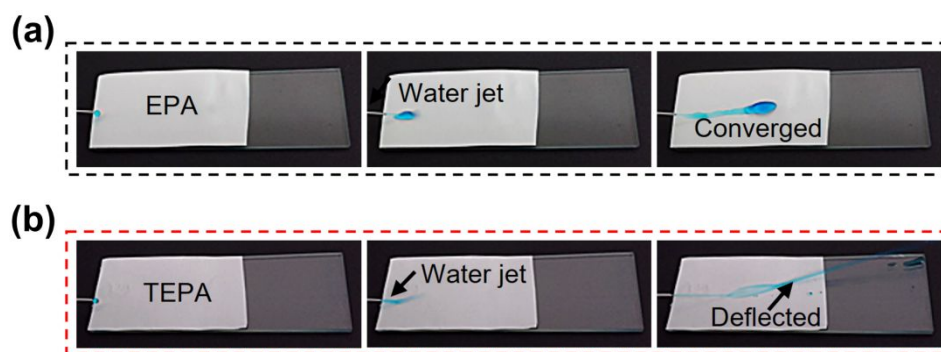

**Figure S6.** The impact of liquid jets on the surface of the (a) EPA-2 and (b) TEPA-3 fibrous membranes.

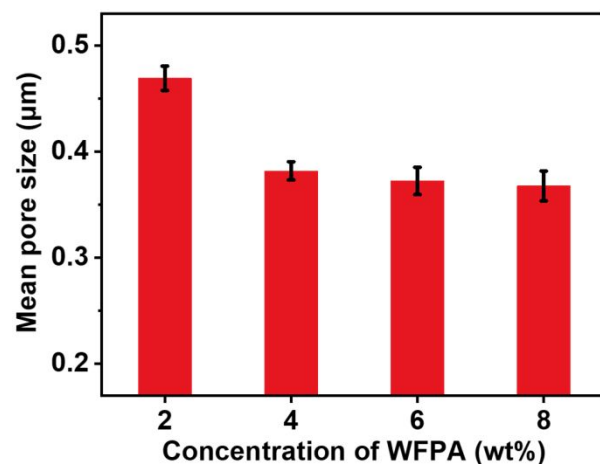

**Figure S7.** The mean pore size of the TEPA membranes with various WFPA concentrations.



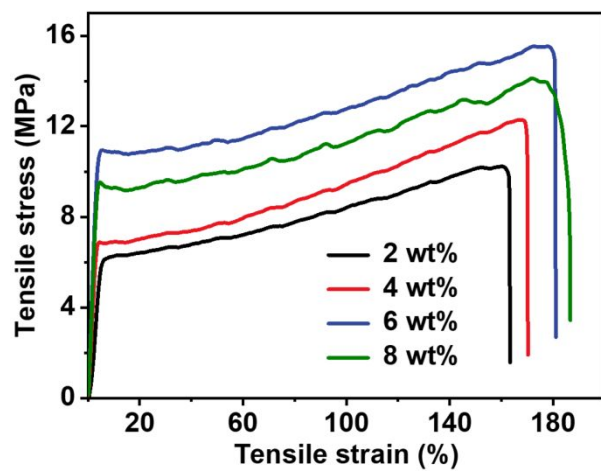

**Figure S8.** Tensile stress-strain curves of the TEPA membranes with various WFPA concentrations.

**Table S1.** XPS data of the TEPA membranes fabricated from various WFPa concentrations.

| Sample | C%    | O%    | N%    | F%    | F/C  |
|--------|-------|-------|-------|-------|------|
| TEPA-0 | 78.51 | 8.72  | 12.77 | 0     | 0    |
| TEPA-1 | 50.43 | 9.04  | 1.35  | 40.53 | 0.80 |
| TEPA-2 | 47.74 | 7.09  | 0.68  | 44.49 | 0.93 |
| TEPA-3 | 39.32 | 9.05  | 2.91  | 48.72 | 1.24 |
| TEPA-4 | 45.45 | 10.12 | 1.68  | 42.75 | 0.94 |
